# Supplementary material for: Real-World Outcomes of Nivolumab, Pembrolizumab, and Atezolizumab Treatment Efficacy in Korean Veterans with Stage IV Non-Small-Cell Lung Cancer
Source: MDPI journal article supplement (doi:10.3390/cancers15164198), 2023-08-21
Supplement: s1 [file s1]

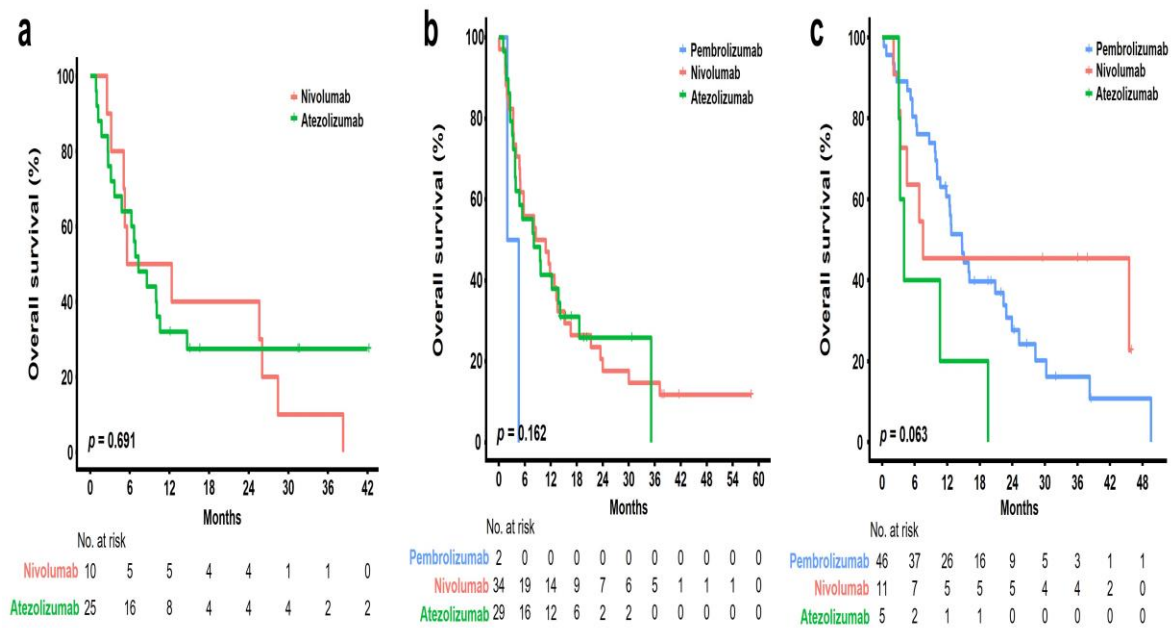

**Figure S1.** Comparison of survival outcomes according to different ICIs: (a) PD-L1 < 1%; (b) PD-L1 1–49%; and (c) PD-L1 ≥ 50%. Data of 162 patients with confirmed PD-L1 expressions were analyzed. No patient was treated with pembrolizumab in the PD-L1 < 1% subgroup.
